# Supplementary material
Source: PubMed Central journal article supplement (PMC2981159)
Supplement: NIHMS249799-supplement-01.pdf [file NIHMS249799-supplement-01.pdf]

Table S1

| <b>Protein</b>              | <b>Unique Peptides</b> |
|-----------------------------|------------------------|
| DHX30                       | 11                     |
| Upf1                        | 4                      |
| YTH domain family protein 2 | 1                      |

**Table S1. Identification of mRNP Components by Mass Spectrometry, Related to Figure 1**

Proteins represented by one or more peptides in purified HIV  $\Delta$ U3 LTR-containing mRNPs but not identified in purified bGH pA element-containing mRNPs are listed.
